# Supplementary material for: Exploring the Anticancer Potential of Semisynthetic Derivatives of 7α-Acetoxy-6β-hydroxyroyleanone from Plectranthus sp.: An In Silico Approach
Source: MDPI journal article supplement (doi:10.3390/ijms25084529), 2024-04-20
Supplement: s1 [file s1]

## Supplementary materials

The FTIR, NMR and MS results of compounds: 7 $\alpha$ -acetoxy-6 $\beta$ -hydroxyroyleanone (1), 7 $\alpha$ -acetoxy-6 $\beta$ -hydroxy-12-O-(4-fluoro)benzoylroyleanone (2), 7 $\alpha$ -acetoxy-6 $\beta$ -(4-fluoro)benzoxy-12-O-(4-fluoro)benzoylroyleanone (3), 7 $\alpha$ -acetoxy-6 $\beta$ -hydroxy-12-O-trimethylacetylroyleanone (4), 7 $\alpha$ -acetoxy-6 $\beta$ -hydroxy-12-O-(2-fluoroyl)royleanone (5).

**7 $\alpha$ -acetoxy-6 $\beta$ -hydroxyroyleanone (1):** <sup>1</sup>H-NMR (300 MHz, Chloroform-*d*, ppm):  $\delta$  7.22 (s, 1H, 12-OH), 5.66 (dd, *J* = 2.2, 0.7 Hz, 1H, H-7 $\beta$ ), 4.31 (s, 1H, H-6 $\alpha$ ), 3.16 (sept, *J* = 7.1 Hz, 1H, H-15), 2.63 (d, *J* = 12.8 Hz, 1H, H-1 $\beta$ ), 2.04 (s, 3H, 7 $\alpha$ -OAc), 1.89–1.78 (m, 1H, H-2 $\beta$ ), 1.61 (s, 3H, Me-20), 1.55 – 1.46\* (m, 2H, H-2 $\alpha$  and H-3 $\beta$ ), 1.33 (s, 1H, H-5 $\alpha$ ), 1.23\* (s, 3H, Me-19), 1.22\* (d, *J* = 7.1 Hz, 3H, Me-17), 1.21\* (s, 1H, H-3 $\alpha$  +), 1.20\* (d, *J* = 7.1 Hz, 3H Me-16), 1.18\* (s, 1H H-1 $\alpha$  +), 0.94 (s, 3H, Me-18). \* overlapped signals, + can be changed.

**7 $\alpha$ -acetoxy-6 $\beta$ -hydroxy-12-O-(4-fluoro)benzoylroyleanone (2):** The compound was prepared according to the general procedure, with 4-fluorobenzoyl chloride (929.0  $\mu$ mol, 15 equiv.) then heated at 50°C overnight. The crude mixture was purified by preparative chromatography with mixture of hexane/ethyl acetate (8:2). The reaction afforded pure products **2** (44 %) and **3** (11 %). Derivative **2** was obtained as a yellow amorphous solid. **mp:** 192–194°C.  $[\alpha]_D^{20} = +41.2^\circ$  (c, 0.340, CHCl<sub>3</sub>). **IR**  $\bar{\nu}_{\text{max}}$ : 3528.5, 2969.9, 2929.4, 2868.7, 1751.5, 1666.5, 1605.8, 1512.7, 1468.2, 1371.0, 1253.7, 1217.3, 1140.4, 1108.0, 1063.5, 1027.0, 857.0, 759.9 cm<sup>-1</sup>. **<sup>1</sup>H NMR (400 MHz, Chloroform-*d*):**  $\delta$  8.17 (dt, *J* = 8.6, 5.4 Hz, 2H, H-2' +), 7.20 (t, *J* = 8.6 Hz, 2H, H-2' +), 5.68 (d, *J* = 2.0 Hz, 1H, H-7 $\beta$ ), 4.34 (s, 1H, H-6 $\alpha$ ), 3.18 (qui, *J* = 7.1 Hz, 1H, H-15), 2.49 (s, 1H, H-1 $\beta$ ), 2.07 (s, 3H, 7 $\alpha$ -OAc), 1.89 – 1.73 (m, 1H, H-2 $\beta$ ), 1.63 (s, 3H, Me-20), 1.55 (dt, *J* = 14.1, 3.7 Hz, 1H, H-2 $\alpha$ ), 1.46 (dt, *J* = 14.1, 3.3 Hz, 1H, H-3 $\beta$ ), 1.37 (s, 1H, H-5 $\alpha$ ), 1.27 – 1.16\* (m, 11H, Me-19, Me-17, H-3 $\alpha$ , Me-16, H-1 $\alpha$ ), 0.95 (s, 3H, Me-18). \* Overlapped signal; + can be changed. **<sup>13</sup>C NMR (101 MHz, Chloroform-*d*):**  $\delta$  185.88 (C-14), 179.79 (C-11), 169.89 (7 $\alpha$ -C(=O)CH<sub>3</sub>), 167.94 (12-C(=O)O), 167.94 (C-1' +), 153.22 (C-9), 149.68 (C-12), 139.61 (C-13), 135.85 (C-8), 133.41 (C-3' ++), 133.31 (C-3' ++), 124.41 (C-4' +), 116.33 (C-2' ++), 116.11 (C-2' ++), 69.03 (C-7), 67.33 (C-6), 49.92 (C-5), 42.41 (C-3), 39.07 (C-10), 38.47 (C-1), 33.87 (C-4), 33.67 (C-18), 25.31 (C-15), 23.98 (C-19), 21.87 (C-20), 21.07 (7 $\alpha$ -COCH<sub>3</sub>), 20.59 (C-16), 20.37 (C-17), 19.02 (C-2). + and ++ can be changed. **HRMS (ESI-MS)** *m/z* calculated for C<sub>29</sub>H<sub>34</sub>FO<sub>7</sub> [M+H]<sup>+</sup> 513.2283, found 513.2285.

**7 $\alpha$ -acetoxy-6 $\beta$ -(4-fluoro)benzoxy-12-O-(4-fluoro)benzoylroyleanone (3):** The pure derivative was obtained as yellow needles (11 %). **mp:** 162–164°C.  $[\alpha]_D^{20} = -91.9^\circ$  (c 0.272, CHCl<sub>3</sub>). **IR**  $\bar{\nu}_{\text{max}}$ : 2971.5, 2932.4, 2877.0, 1749.0, 1726.3, 1667.6, 1605.7, 1507.9, 1432.9, 1260.1, 1217.7, 1155.8, 1136.2, 1107.0, 1090.6, 1061.3, 1012.4, 852.6, 767.9, 738.5, 705.9, 685.4 cm<sup>-1</sup>. **<sup>1</sup>H NMR (300 MHz, Chloroform-*d*):**  $\delta$  8.18 (dd, *J* = 8.9, 5.3 Hz, 1H, H-3' +), 8.13 (dd, *J* = 9.0, 5.4 Hz, 1H, H-3' +), 7.25 – 7.04 (m, 4H, H-2', H-2''), 5.89 (d, *J* = 1.7 Hz, 1H, H-7 $\beta$ ), 5.78 (s, 1H, H-6 $\alpha$ ), 3.18 (p, *J* = 7.0 Hz, 1H, H-15), 2.61 (br s, 1H, H-1 $\beta$ ), 2.11 (s, 3H, 7 $\alpha$ -OAc), 1.87 – 1.77 (m, 1H, H-2 $\beta$ ), 1.74 (d, *J* = 15.2 Hz, 3H, Me-20), 1.70 (s, 1H, H-5 $\alpha$ ), 1.66 – 1.55 (m, 1H, H-2 $\alpha$ ), 1.49 (dt, *J* = 13.5, 3.5 Hz, 1H, H-3 $\beta$ ), 1.34\* (dd, *J* = 5.2, 2.7 Hz, 1H, H-3 $\alpha$  ++), 1.22 (dd, *J* = 7.0, 3.1 Hz, 7H, Me-16, Me-17, H-1 $\alpha$  ++), 1.11 (s, 3H, Me-18), 0.99 (s, 3H, Me-19). \* Overlapped signal; + and ++ can be changed. **<sup>13</sup>C NMR (101 MHz, Chloroform-*d*):**  $\delta$  185.43 (C-14), 168.29 (6-C(=O)O +), 167.75 (C-1' ++), 164.54 (12-C(=O)O +), 163.19 (C-1' ++), 133.44 (C-3' +++), 133.31 (C-3' +++), 133.08 (C-3' ++), 132.95 (C-3' ++), 126.16 (C-4' ++), 124.36 (C-4' ++), 116.44 (C-2' ++), 116.15 (C-2' ++), 116.03 (C-2' ++), 115.74 (C-2' ++), 68.78 (C-6), 65.42 (C-7), 49.48 (C-5), 42.65 (C-3), 38.95 (C-10), 38.31 (C-1), 33.93 (C-4), 33.46 (C-18), 23.36 (C-15), 22.84 (C-19), 22.39 (C-20), 20.96 (7 $\alpha$ -COCH<sub>3</sub>), 20.56 (C-16), 20.50 (C-17), 18.99 (C-2). +, ++ and +++ can be changed. **HRMS (ESI-MS):** *m/z* calculated for C<sub>36</sub>H<sub>36</sub>F<sub>2</sub>O<sub>8</sub> [M+Na]<sup>+</sup> 657.22719, found 657.2270.

**7 $\alpha$ -acetoxy-6 $\beta$ -hydroxy-12-O-trimethylacetylroyleanone (4):** The compound was prepared according to the general procedure, with pivaloyl chloride (408.7  $\mu$ mol, 21 equiv.) then let to react for 50 min. The crude mixture was purified by preparative chromatography with mixture of dichloromethane/acetone (99:1). The pure product (87 %) was obtained as a yellow oil.  $[\alpha]_D^{20} = +22.3^\circ$  (c 0.224, CHCl<sub>3</sub>). **IR**  $\bar{\nu}_{\text{max}}$ : 3516.0, 2965.0, 2932.4, 2870.5,

1762.1, 1749.0, 1667.6, 1615.4, 1485.0, 1462.2, 1371.0, 1276.4, 1227.5, 745.1 cm<sup>-1</sup>. **<sup>1</sup>H NMR (300 MHz, Chloroform-*d*, ppm):** δ 5.65 (d, *J* = 1.9 Hz, 1H, H-7β), 4.32 (t, *J* = 1.7 Hz, 1H, H-6α), 3.12 (qui, *J* = 7.1 Hz, 1H, H-15), 2.49 (dt, *J* = 15.1, 5.6 Hz, 1H, H-1β), 2.05 (s, 3H, 7α-OAc), 1.80 (t, *J* = 13.5 Hz, 1H, H-2β), 1.63 (s, 3H, Me-20), 1.56 (dt, *J* = 14.2, 3.9 Hz, 1H, H-2α), 1.52 – 1.41 (m, 1H, H-3β), 1.38 (s, 9H, Me-2'), 1.33 (s, 1H, H-5α), 1.22 (s, 3H, Me-19), 1.19\* (d, *J* = 7.1 Hz, 8H, Me-17, H-3α, Me-16, H-1α), 0.94 (s, 3H, Me-18). \*Overlapped signal. **<sup>13</sup>C NMR (75 MHz, Chloroform-*d*, ppm):** δ 185.82 (C-14<sup>+</sup>), 179.72 (C-11<sup>+</sup>), 171.76 (12-COO), 169.73(7α-COCH<sub>3</sub>), 154.27(C-9), 140.34(C-12), 139.33(C-13), 135.45 (C-8), 68.98 (C-7), 67.25 (C-6), 49.81(C-5), 42.13 (C-3), 39.23 (C-1'), 38.89(C-10), 38.19(C-1), 33.73(C-4), 33.58(C-18), 27.17 (C-2'), 25.16(C-15), 22.93(C-19), 21.75(C-20), 21.73(7α-COCH<sub>3</sub>), 21.27(C-16), 20.89(C-17), 18.91 (C-2). <sup>+</sup> Can be changed. **HRMS (ESI-MS)** m/z calculated for C<sub>27</sub>H<sub>38</sub>O<sub>7</sub> [M+H]<sup>+</sup> 475.26903, found 475.26853.

**7α-acetoxy-6β-hydroxy-12-O-(2-fluoryl)royleanone (5):** The compound was prepared according to the general procedure, with 2-furoyl chloride (230.5 μmol, 6 equiv.) then let to react for 10 min. The crude mixture was purified by preparative chromatography with dichloromethane. The pure product (49 %) was obtained as a yellow amorphous powder. **mp:** 190-192°C. [α]<sub>D</sub><sup>20</sup> = + 55.7° (c 0.323, CHCl<sub>3</sub>). **IR** ν<sub>max</sub>: 3587.6, 2965.0, 2932.4, 2867.2, 1745.8, 1667.6, 1609.0, 1569.8, 1472.0, 1397.0, 1371.0, 1283.0, 1224.3, 1168.8, 1139.5, 777.7 cm<sup>-1</sup>. **<sup>1</sup>H NMR (300 MHz, Chloroform-*d*):** δ 7.70 (dd, *J* = 1.8, 0.8 Hz, 1H, H-5' <sup>+</sup>), 7.41 (d, *J* = 3.6, 0.8 Hz, 1H, H-3' <sup>+</sup>), 6.61 (dd, *J* = 3.6, 1.8 Hz, 1H, H-4' <sup>+</sup>), 5.68 (d, *J* = 1.7 Hz, 1H, H-7β), 4.34 (t, *J* = 1.7 Hz, 1H, H-6α), 3.17 (qui, *J* = 7.1 Hz, 1H, H-15), 2.52 (br d, *J* = 12.8 Hz, 1H, H-1β), 2.06 (s, 3H, 7α-OAc), 1.87-1.73 (m, 1H, H-2β), 1.63 (s, 3H, Me-20), 1.56 (t, *J* = 3.7 Hz, 1H, H-2α), 1.53-1.47 (m, 1H, H-3β), 1.36 (s, 1H, H-5α), 1.24 – 1.20\* (m, 11H, Me-19, Me-17, H-3α, Me-16, H-1α), 0.95 (s, 3H, Me-18). \* Overlapped signal; <sup>+</sup> can be changed. **<sup>13</sup>C NMR (75 MHz, Chloroform-*d*, ppm):** δ 185.72 (C-14), 179.51 (C-11), 169.69 (7α-COCH<sub>3</sub>), 155.35 (12-COO), 153.03 (C-9), 148.89 (C-12), 147.93 (C-5' <sup>+</sup>), 142.75 (C-2'), 139.96 (C-13), 135.73 (C-8), 120.75 (C-3' <sup>+</sup>), 112.46 (C-4' <sup>+</sup>), 69.90 (C-7), 67.23 (C-6), 49.79 (C-5), 42.30 (C-3), 38.94 (C-10), 38.35 (C-1), 33.74 (C-4), 33.51 (C-18), 25.25 (C-15), 23.85 (C-19), 21.75 (C-20), 20.90 (7α-COCH<sub>3</sub>), 20.30 (C-16), 20.24 (C-17), 18.89 (C-2). **HRMS (ESI-MS):** m/z calculated for C<sub>27</sub>H<sub>32</sub>O<sub>8</sub> [2M+Na]<sup>+</sup> 991.4087, found 991.40850.

Supplementary Table S1. Predicted physicochemical properties of the screened compounds, obtained using SwissADME server.

| Compound<br>s | Formula    | MW     | No.<br>heav<br>y<br>atom<br>s | No.<br>aromati<br>c heavy<br>atoms | Fraction Csp3 | No.<br>ratable<br>bonds | No. H-<br>bond<br>acceptor<br>s | No. H-<br>bond<br>donor<br>s | Molar<br>refractivity |
|---------------|------------|--------|-------------------------------|------------------------------------|---------------|-------------------------|---------------------------------|------------------------------|-----------------------|
| 1             | C22H30O6   | 390.47 | 28                            | 0                                  | 0.68          | 3                       | 6                               | 2                            | 104.48                |
| 2             | C29H33FO7  | 512.57 | 37                            | 6                                  | 0.52          | 6                       | 8                               | 1                            | 133.66                |
| 3             | C36H36F2O8 | 634.66 | 46                            | 12                                 | 0.42          | 9                       | 10                              | 0                            | 163.26                |
| 4             | C27H38O8   | 490.59 | 35                            | 0                                  | 0.70          | 7                       | 8                               | 1                            | 129.74                |
| 5             | C27H32O8   | 484.54 | 35                            | 5                                  | 0.56          | 6                       | 8                               | 1                            | 125.97                |

|   |                 |       |    |    |      |   |   |   |        |
|---|-----------------|-------|----|----|------|---|---|---|--------|
| 6 | C36H36Cl2O<br>8 | 66.57 | 46 | 12 | 0.42 | 9 | 8 | 0 | 173.36 |
|---|-----------------|-------|----|----|------|---|---|---|--------|

Supplementary Table S2. Predicted lipophilicity of the screened compounds obtained using SwissADME server.

| Compounds | TPSA   | iLOGP | XLOGP3 | WLOGP | MLOGP | Silicos-IT<br>LogP | Consensus<br>LogP |
|-----------|--------|-------|--------|-------|-------|--------------------|-------------------|
| 1         | 100.90 | 3.11  | 3.36   | 3.04  | 1.43  | 3.22               | 2.83              |
| 2         | 106.97 | 3.99  | 5.23   | 4.90  | 3.19  | 5.28               | 4.52              |
| 3         | 113.04 | 4.95  | 7.56   | 7.32  | 4.84  | 7.31               | 6.40              |
| 4         | 116.20 | 4.37  | 4.86   | 4.44  | 2.02  | 4.22               | 3.98              |
| 5         | 120.11 | 3.90  | 4.53   | 3.93  | 1.68  | 4.21               | 3.65              |
| 6         | 113.04 | 5.05  | 8.62   | 7.51  | 5.02  | 7.75               | 6.79              |

Supplementary Table S3. Predicted water solubility of the screened compounds obtained using SwissADME server.

| Compounds | ES<br>OL<br>log<br>S | ESOL<br>L<br>solu<br>bility<br>[mg/<br>mL] | ESOL<br>L<br>solu<br>bility<br>[mol/<br>L] | ESOL<br>class                 | Ali<br>i<br>lo<br>g S | Ali<br>solu<br>bility<br>[mg/<br>mL] | Ali<br>solu<br>bility<br>[mol/<br>L] | Ali<br>class                  | Silico<br>s-IT<br>log S | Silicos-<br>IT<br>solubilit<br>y<br>[mg/mL<br>] | Silico<br>s-IT<br>solu<br>bility<br>[mol/<br>L] | Silicos-IT<br>class    |
|-----------|----------------------|--------------------------------------------|--------------------------------------------|-------------------------------|-----------------------|--------------------------------------|--------------------------------------|-------------------------------|-------------------------|-------------------------------------------------|-------------------------------------------------|------------------------|
| 1         | -<br>4.1<br>8        | 2.58e<br>-02                               | 6.61e<br>-05                               | Mode<br>rately<br>solubl<br>e | -<br>5,1<br>6         | 2.72e<br>-03                         | 6.97e<br>-06                         | Mode<br>rately<br>solubl<br>e | -3.61                   | 9.58e-02                                        | 2.45e<br>-04                                    | Soluble                |
| 2         | -<br>6.0<br>4        | 4.71e<br>-04                               | 9.19e<br>-07                               | Poorly<br>solubl<br>e         | -<br>7.2<br>2         | 3.05e<br>-05                         | 5.96e<br>-08                         | Poorly<br>solubl<br>e         | -6.55                   | 1.45e-04                                        | 2.83e<br>-07                                    | Poorly<br>soluble      |
| 3         | -<br>8.1<br>4        | 4.63e<br>-06                               | 7.30e<br>-09                               | Poorly<br>solubl<br>e         | -<br>9.7<br>7         | 1.08e<br>-07                         | 1.70e<br>-10                         | Poorly<br>solubl<br>e         | -9.45                   | 2.24e-07                                        | 3.53e<br>-10                                    | Poorly<br>soluble      |
| 4         | -<br>5.8<br>4        | 1.62e<br>-03                               | 3.30e<br>-06                               | Mode<br>rately<br>solubl<br>e | -<br>7.0<br>3         | 4.53e<br>-05                         | 9.23e<br>-08                         | Poorly<br>solubl<br>e         | -4.73                   | 9.18e-03                                        | 1.87e<br>-05                                    | Moderatel<br>y soluble |

|   |       |          |          |                  |        |          |          |                |        |          |          |                    |
|---|-------|----------|----------|------------------|--------|----------|----------|----------------|--------|----------|----------|--------------------|
| 5 | -5.41 | 1.89e-03 | 3.91e-06 | Modestly soluble | -6.77  | 8.15e-05 | 1.68e-07 | Poorly soluble | -5.51  | 1.48e-03 | 3.06e-06 | Moderately soluble |
| 6 | -9.01 | 6.54e-07 | 9.80e-10 | Poorly soluble   | -10.87 | 9.01e-09 | 1.35e-11 | Insoluble      | -10.08 | 5.58e-08 | 8.36e-11 | Insoluble          |

Supplementary Table S4. Predicted pharmacokinetics parameters of the screened compounds obtained using SwissADME server.

| Compounds | GI adsorption | BBB permeant | Pgp substrate | CYP1A2 inhibitor | CYP2C19 inhibitor | CYP2C9 inhibitor | CYP2D6 inhibitor | CYP3A4 inhibitor | Log Kp [cm/s] |
|-----------|---------------|--------------|---------------|------------------|-------------------|------------------|------------------|------------------|---------------|
| 1         | High          | No           | Yes           | No               | No                | No               | No               | Yes              | -6.30         |
| 2         | High          | No           | Yes           | No               | No                | Yes              | No               | Yes              | -5.71         |
| 3         | Low           | No           | Yes           | No               | No                | Yes              | No               | No               | -4.80         |
| 4         | High          | No           | Yes           | No               | No                | Yes              | No               | No               | -5.84         |
| 5         | High          | No           | Yes           | No               | No                | Yes              | No               | Yes              | -6.04         |
| 6         | Low           | No           | Yes           | No               | No                | Yes              | No               | No               | -4.25         |

Supplementary Table S5. Predicted drug-likeness, medicinal chemistry and lead-likeness pharmacokinetics parameters of the screened compounds obtained using SwissADME server.

| Compounds | Lipinski # violations | Ghose # violations | Veber # violations | Egan # violations | Muegge # violations | Bioavailability score | PAI NS # alerts | Brenks # alerts | Leadlikeness # violations | Synthetic accessibility |
|-----------|-----------------------|--------------------|--------------------|-------------------|---------------------|-----------------------|-----------------|-----------------|---------------------------|-------------------------|
| 1         | 0                     | 0                  | 0                  | 0                 | 0                   | 0.56                  | 1               | 1               | 1                         | 5.23                    |
| 2         | 1                     | 2                  | 0                  | 0                 | 1                   | 0.56                  | 1               | 2               | 2                         | 5.65                    |
| 3         | 2                     | 4                  | 0                  | 1                 | 2                   | 0.56                  | 1               | 2               | 3                         | 6.16                    |
| 4         | 0                     | 2                  | 0                  | 0                 | 0                   | 0.56                  | 1               | 2               | 2                         | 5.09                    |
| 5         | 0                     | 1                  | 0                  | 0                 | 0                   | 0.56                  | 1               | 2               | 2                         | 5.73                    |
| 6         | 2                     | 4                  | 0                  | 1                 | 2                   | 0.56                  | 1               | 2               | 3                         | 6.15                    |

Supplementary Table S6. Predicted organ toxicity and toxicological endpoints of the screened compounds obtained using ProTox-II server.

| Compounds | Hepatotoxicity<br>(% probability) | Carcinogenicity<br>(% probability) | Immunotoxicity<br>(% probability) | Mutagenicity<br>(% probability) | Cytotoxicity<br>(% probability) |
|-----------|-----------------------------------|------------------------------------|-----------------------------------|---------------------------------|---------------------------------|
| 1         | Inactive (72)                     | Active (50)                        | Active (94)                       | Inactive (85)                   | Inactive (81)                   |
| 2         | Inactive (69)                     | Active (56)                        | Active (99)                       | Inactive (84)                   | Inactive (74)                   |
| 3         | Inactive (57)                     | Active (58)                        | Active (99)                       | Inactive (78)                   | Inactive (75)                   |
| 4         | Inactive (73)                     | Inactive (50)                      | Active (84)                       | Inactive (85)                   | Inactive (85)                   |
| 5         | Inactive (74)                     | Active (51)                        | Active (89)                       | Inactive (76)                   | Inactive (85)                   |
| 6         | Inactive (55)                     | Active (60)                        | Active (99)                       | Inactive (77)                   | Inactive (74)                   |

Supplementary Table S7. Toxicological pathways: nuclear receptor signaling pathways predicted for the screened compounds obtained using ProTox-II server (% probability).

| Compounds | Aryl<br>Hydrocarbon<br>Receptor<br>(AhR) | Androgen<br>Receptor<br>(AR) | Androgen<br>Receptor<br>Ligand<br>Binding<br>Domain<br>(AR-LBD) | Aromatase        | Estrogen<br>Receptor<br>Alpha<br>(ER) | Estrogen<br>Receptor<br>Ligand<br>Binding<br>Domain<br>(ER-LBD) | Peroxisome<br>Proliferator<br>Activated<br>Receptor<br>Gamma<br>(PPAR-<br>Gamma) |
|-----------|------------------------------------------|------------------------------|-----------------------------------------------------------------|------------------|---------------------------------------|-----------------------------------------------------------------|----------------------------------------------------------------------------------|
| 1         | Inactive (91)                            | Inactive<br>(86)             | Inactive<br>(87)                                                | Inactive<br>(87) | Inactive<br>(77)                      | Inactive<br>(87)                                                | Inactive (96)                                                                    |
| 2         | Inactive (85)                            | Inactive<br>(79)             | Inactive<br>(82)                                                | Inactive<br>(82) | Inactive<br>(62)                      | Inactive<br>(91)                                                | Inactive (94)                                                                    |
| 3         | Inactive 85)                             | Inactive<br>(81)             | Inactive<br>(80)                                                | Inactive<br>(82) | Inactive<br>(69)                      | Inactive<br>(89)                                                | Inactive (94)                                                                    |
| 4         | Inactive (91)                            | Inactive<br>(85)             | Inactive<br>(87)                                                | Inactive<br>(84) | Inactive<br>(79)                      | Inactive<br>(84)                                                | Inactive (96)                                                                    |
| 5         | Inactive (93)                            | Inactive<br>(70)             | Inactive<br>(83)                                                | Inactive<br>(65) | Inactive<br>(71)                      | Inactive<br>(93)                                                | Inactive (94)                                                                    |
| 6         | Inactive (82)                            | Inactive<br>(83)             | Inactive<br>(79)                                                | Inactive<br>(76) | Inactive<br>(77)                      | Inactive<br>(90)                                                | Inactive (94)                                                                    |

Supplementary Table S8. Toxicological pathways: stress response pathways predicted for the screened compounds obtained using ProTox-II server (% probability).

| Compounds | Nuclear Factor<br>(Erythroid-Derived<br>2-Antioxidant<br>Responsive<br>Element)<br>(nrf2/ARE) | Heat Shock<br>Factor<br>Response<br>Element<br>(HSE) | Mitochondrial<br>Membrane<br>Potential (MMP) | Phosphoprotein<br>(Tumor<br>Suppressor) p53 | ATPase<br>Family AAA<br>Domain<br>Containing<br>Protein 5<br>(ATAD5) |
|-----------|-----------------------------------------------------------------------------------------------|------------------------------------------------------|----------------------------------------------|---------------------------------------------|----------------------------------------------------------------------|
| 1         | Inactive (76)                                                                                 | Inactive (76)                                        | Inactive (58)                                | Inactive (93)                               | Inactive (84)                                                        |
| 2         | Inactive (91)                                                                                 | Inactive (91)                                        | Inactive (51)                                | Inactive (82)                               | Inactive (86)                                                        |
| 3         | Inactive (84)                                                                                 | Inactive (84)                                        | Active (52)                                  | Inactive (70)                               | Inactive (87)                                                        |
| 4         | Inactive (84)                                                                                 | Inactive (84)                                        | Inactive (58)                                | Inactive (93)                               | Inactive (86)                                                        |
| 5         | Inactive (92)                                                                                 | Inactive (92)                                        | Active (50)                                  | Inactive (87)                               | Inactive (85)                                                        |
| 6         | Inactive (84)                                                                                 | Inactive (84)                                        | Active (56)                                  | Inactive (57)                               | Inactive (85)                                                        |

Supplementary Table S9. Predicted acute toxicity of the screened compounds obtained using StopTox server.

| Compounds | Inhalation Toxicity | Oral Toxicity | Dermal Toxicity | Eye Irritation and Corrosion | Skin Sensitization | Skin Irritation and Corrosion |
|-----------|---------------------|---------------|-----------------|------------------------------|--------------------|-------------------------------|
| 1         | No                  | No            | No              | No                           | No                 | No                            |
| 2         | No                  | No            | No              | No                           | No                 | No                            |
| 3         | No                  | No            | No              | No                           | No                 | No                            |
| 4         | No                  | No            | No              | No                           | No                 | No                            |
| 5         | No                  | No            | No              | No                           | No                 | No                            |
| 6         | No                  | No            | No              | No                           | No                 | No                            |

Supplementary Table S10. OSIRIS output of potential harmful properties of compounds

| Compounds | Mutagenic Potential | Tumorigenic Potential | Irritant Potential | Reproductive Effectivity |
|-----------|---------------------|-----------------------|--------------------|--------------------------|
| 1         | Medium              | Low                   | High               | Low                      |
| 2         | Medium              | Low                   | High               | Low                      |
| 3         | Medium              | Low                   | High               | Low                      |
| 4         | Medium              | Low                   | High               | Low                      |
| 5         | Medium              | Low                   | High               | Low                      |
| 6         | Medium              | Low                   | High               | Low                      |

Supplementary Table S11. The molecular docking results of compounds 1-6 against target proteins.

| Compound     | Binding energy (kcal/mol) | Hydrogen bonds         | Other bonds                                                                                                                                                                                                 |
|--------------|---------------------------|------------------------|-------------------------------------------------------------------------------------------------------------------------------------------------------------------------------------------------------------|
| <b>BCL-2</b> |                           |                        |                                                                                                                                                                                                             |
| 1            | -9.50                     | ASP B: 70              | GLU B: 111, PHE B: 112, GLY B: 104, ALA B: 108, ARG B: 105, LEU B: 96, PHE B: 63, TYR B: 67, MET B: 74, PHR B: 71                                                                                           |
| 2            | -10.24                    | -                      | PHE B: 63, TYR B: 161, SER A: 76, GLY B: 162, LEU B: 160, ALA A: 72, PRO B: 163, GLU B: 58, ALA B: 59, ASP B: 62, VAL B: 107, GLY B: 104, TYR B: 67, ARG B: 66                                              |
| 3            | -10.65                    | TYR B: 161             | GLU B: 58, ALA B: 59, GLU B: 60, VAL B: 107, PHE B: 63, ARG B: 65, ASP B: 62, ASN A: 122, GLY B: 104, ARG B: 66, ARG A: 68, TRP B: 103, PRO B: 163, GLY B: 162, LEU B: 160, SER A: 76, GLU A: 73, ALA A: 72 |
| 4            | -9.33                     | GLY B: 162, LEU B: 160 | ALA A: 72, TYR B: 161, SER A: 76, PRO B: 163, THR B: 55, GLU B: 58, ALA B: 59, ASP B: 62, GLY B: 104, VAL B: 107, PHE B: 63                                                                                 |
| 5            | -10.90                    | PRO B: 163             | GLU B: 58, TYR B: 161, ASP B: 62, PHE B: 63, GLY B: 104, ALA B: 59, VAL B: 107, ALA A: 72, GLU A: 73, LEU B: 160, GLY B: 162, SER A: 76                                                                     |

|                  |        |                                            |                                                                                                                                                                                                                                              |
|------------------|--------|--------------------------------------------|----------------------------------------------------------------------------------------------------------------------------------------------------------------------------------------------------------------------------------------------|
| 6                | -10.55 | -                                          | TYR B: 67, VAL B: 107, PHE B: 63, ALA B: 59, ARG B: 66, ASP B: 62, GLU B: 58, GLU A: 119, ASN A: 122, SER A: 75, PRO B: 163, GLY B: 162, SER A: 76, LEU B: 160, ALA A: 72, ARG B: 105, GLY B: 104, ARG A: 68                                 |
| <b>BCL-XL</b>    |        |                                            |                                                                                                                                                                                                                                              |
| 1                | -10.42 | -                                          | PHE A: 105, TYR A: 101, ARG A: 100, ASP B: 133, ARG A: 103, ARG B: 132, GLU B: 129, ALA A: 104, PHE B: 131, LEU B: 130, PHE B: 105, ALA B: 141, ASN B: 136, GLY B: 138, PHE B: 97                                                            |
| 2                | -11.39 | -                                          | TYR A: 195, TYR A: 101, GLU A: 96, ALA A: 93, VAL A: 141, PHE A: 97, PHE A: 105, ALA A: 142, ARG A: 139, ALA B: 104, LEU A: 108, ASN A: 136, GLY A: 138, TRP A: 137, LEU A: 130                                                              |
| 3                | -11.58 | ARG B: 139                                 | TYR A: 195, GLU A: 92, ASN A: 197, GGLU A: 96, ALA A: 93, VAL A: 141, GLY A: 94, GLY A: 138, PHE A: 97, TYR A: 101, ALA A: 142, ARG A: 139, ALA A: 104, PHE B: 105, ASM A: 136, PHE A: 105                                                   |
| 4                | -10.88 | ARG A: 139                                 | PHE A: 131, LEUA: 130, ALAB: 104, GLY1: 138, PHEA: 97, ALAA: 142, ASNA: 136, PHEA: 105, PHEB: 105, ARGB: 103, TYRB: 101, ARG A: 132, ARG A: 100, ASPA: 133, GLUA: 129                                                                        |
| 5                | -11.61 | -                                          | SER B: 145, PHE B: 146, ARG B: 102, THR B: 109, LEU B: 108, SER B: 106, ALA A: 104, LEU B: 130, GLU B: 129, TYR B: 101, ASP B: 133, ASN B: 136, PHE B: 97, GLY B: 138, ARG B: 139, PHE B: 105, ALA B: 142                                    |
| 6                | -12.28 | ARG B: 139                                 | ARG A: 100, ARG A: 103, ASN B: 136, ALA A: 104, GLY B: 138, PHE B: 97, PHE B: 105, ASN A: 136, ARG B: 100, TYR B: 101, ALA A: 142, ALA B: 104, ARG A: 139, GLY A: 138, PHE A: 105, PHE A: 97, LEU A: 130, TYR A: 101, LEU B: 130, ARG A: 100 |
| <b>Caspase 3</b> |        |                                            |                                                                                                                                                                                                                                              |
| 1                | -9.09  | TYRA: 197, PROB: 201                       | LYSA: 137, GLYB: 202, TYRB: 203, ALAB: 200, TYRA: 195, VALA: 266, META: 268, GLYA: 125, THRA: 140, ARG A: 164, LEUA: 136, GLUA: 124, ASPA: 135                                                                                               |
| 2                | -9.61  | TYRB: 197                                  | TYRA: 195, META: 268, PROB: 201, ARG A: 164, TYRA: 197, VALA: 266, VALB: 266, CYSA: 264, CYSB: 264, ARGB: 164, TYRB: 195, LEUB: 136, THRB: 140, GLYB: 125, GLYA: 202, LYSB: 137, GLUA: 124, GLUB: 124, PROA: 201                             |
| 3                | -10.28 | TYRA: 197                                  | TYRB: 197, VALA: 266, VALB: 266, META: 268, THRA: 140, ARGB: 164, TYRA: 195, LEUA: 136, GLYA: 125, ASPA: 135, LYSA: 137, TYRB: 203, GLUB: 167, GLYB: 202, GLUB: 124, GLUA: 124, PROB: 201, CYSA: 264, ARG A: 164, PROA: 201                  |
| 4                | -8.69  | ASPB: 135, GLYB: 125, LYSB: 137, PROA: 201 | GLUB: 124, ILEB: 126, GLYA: 202, GLUA: 124, ALAA: 200, TYRA: 203, METB: 268, TYRB: 195, THRB: 140, LEUB: 136, TYRB: 197                                                                                                                      |
| 5                | -9.22  | PRO A: 201                                 | GLU B: 124, GLY A: 202, GLU A: 124, MET B: 268, VAL B: 266, TYR B: 195, LEU B: 136, TYR B: 197, THR B: 140, LYS B: 137, ASP B: 135, GLY B: 125, ILE B: 126                                                                                   |
| 6                | 9.03   | -                                          | LYS B: 137, LEU B: 136, ARG B: 164, PRO B: 201, VAL A: 266, ARG A: 164, TYR A: 197, GLU B: 124, GLU A: 124, ASP A: 135, GLY A: 125, LYS A: 137, VAL B: 266, PRO A: 201, GLY B: 125, TYR B: 197                                               |
| <b>Caspase 9</b> |        |                                            |                                                                                                                                                                                                                                              |
| 1                | -10.60 | THRB: 181, PROB: 349                       | THRB: 179, ARGB: 178, HISB: 237, CYSB: 287, ARGB: 180, PHEB: 351, SERB: 361, PHEB: 348, GLYB: 350, GLYB: 360, GLYB: 182, ASPB: 186, SERB: 183, PROB: 357                                                                                     |
| 2                | -9.31  | LYSB: 394, GLYB: 350                       | GLYB: 395, ILEB: 396, TYRB: 397, PHEB: 348, PROB: 349, LYSB: 398, PHEB: 351, CYSB: 287, GLYB: 288, TRPB: 354                                                                                                                                 |



|             |        |                                 |                                                                                                                                                                                                                                                                                                                     |
|-------------|--------|---------------------------------|---------------------------------------------------------------------------------------------------------------------------------------------------------------------------------------------------------------------------------------------------------------------------------------------------------------------|
| 3           | -10.89 | CYSB: 287                       | THRB: 179, THRB: 181, ARGB: 180, PHEB: 351, HISB: 237, GLYB: 288, TRPB: 354, ARGB: 355, GLYB: 350, PROB: 349, ARGB: 178, LYSB: 358                                                                                                                                                                                  |
| 4           | -9.63  | ARGB: 180, THRB: 181, CYSB: 287 | HISB: 237, PROB: 349, ARGB: 178, PHEB: 351, PROB: 357, THRB: 179, LYSB: 358, SERB: 183, ASPB: 186, SERB: 361, GLNB: 285, GLYB: 182, GLYB: 360,                                                                                                                                                                      |
| 5           | -9.27  | TRP B: 354                      | TYR B: 397, ILE B: 396, GLY B: 395, LYS B: 398, GLY B: 350, PHE B: 348, LYS B: 394, TRP B: 362, PRO B: 349, ARG B: 355, PHE B: 351, PRO B: 357                                                                                                                                                                      |
| 6           | -11.31 |                                 | ARG B: 355, TRP B: 354, GLY B: 350, PRO B: 349, PHE B: 351, GLY B: 288, HIS B: 237, CYS B: 287, ARG B: 180, GLY B: 182, GLY B: 360, ASP B: 186, SER B: 361, SER B: 183, THR B: 181, PRO B: 357, ARG A: 178, THR B: 179                                                                                              |
| <b>CDK2</b> |        |                                 |                                                                                                                                                                                                                                                                                                                     |
| 1           | -11.86 | -                               | GLYA: 11, GLNA: 131, GLUA: 12, ASNA: 132, LYSA: 33, ASPA: 145, ALAA: 144, VALA: 18, PHEA: 80, ALAA: 31, VALA: 64, LEUA: 134, GLUA: 81, ILEA: 10, LEUA: 83, PHEA: 82, HISA: 84, GLNA: 85, ASPA: 86                                                                                                                   |
| 2           | -12.50 | LYSA: 33, ASPA: 145             | LEUA: 83, PHEA: 82, GLUA: 81, ALAA: 31, VALA: 64, LEUA: 134, PHEA: 80, ALAA: 144, ASNA: 132, GLYA: 16, GLNA: 131, GLYA: 13, GLUA: 12, GLYA: 11, VALA: 18, ILEA: 10, ASPA: 86, GLNA: 85, LYSA: 89                                                                                                                    |
| 3           | -12.20 | LYSA: 88                        | GLNA: 131, GLYA: 11, GLNA: 85, GLUA: 12, ALAA: 31, LEUA: 83, LEUA: 134, GLUA: 81, ALAA: 144, VALA: 64, PHEA: 80, VALA: 18, LYSA: 9, PHEA: 82, HISA: 84, ASPA: 86, LYSA: 89, ASPA: 92                                                                                                                                |
| 4           | -12.53 | LYSA: 33, ASPA: 145             | LEUA: 83, GLUA: 81, ALAA: 31, LEUA: 134, VALA: 64, PHEA: 80, LEUA: 148, GLUA: 12, GLYA: 11, THRA: 14, GLYA: 13, VALA: 18, ASNA: 132, PHEA: 82, ALAA: 144, GLNA: 131, HISA: 84, ILEA: 10, ASPA: 86, GLNA: 85                                                                                                         |
| 5           | -13.42 | LYS A: 145, LYS A: 33           | GLN A: 85, LEU A: 83, ILE A: 10, PHE A: 82, GLU A: 81, VAL A: 64, PHE A: 80, ALA A: 31, LEU A: 134, ALA A: 144, LEU A: 148, GLY A: 13, GLU A: 12, LYS A: 129, ASN A: 132, GLY A: 11, GLN A: 131, VAL A: 18, ASP A: 86                                                                                               |
| 6           | -10.90 | LYS A: 89                       | GLY A: 11, LYS A: 88, ASP A: 92, ASP A: 86, GLN A: 131, LYS A: 9, HIS A: 84, LEU A: 298, PHE A: 82, LYS A: 20, LEU A: 83, GLN A: 85, LEU A: 134                                                                                                                                                                     |
| <b>CDK6</b> |        |                                 |                                                                                                                                                                                                                                                                                                                     |
| 1           | -11.36 | VAL A: 150                      | 192LEU A: 32, PRO A: 35, LEU A: 34, ARG A: 30, ARG A: 82, ALA A: 149, ALA A: 152, LEU A: 151, SER A: 78, ILE A: 198, ALA A: 191, LEU A: 193, PRO A: 195, LEU A: 192, SER A: 194                                                                                                                                     |
| 2           | -13.35 | LEU A: 193                      | PRO A: 35, LYS A: 36, THR A: 38, CYS A: 85, LEU A: 34, SER A: 39, ALA A: 191, LEU A: 192, SER A: 194, GLU A: 31, PRO A: 195, LEU A: 151, VAL A: 150, ILE A: 198, LEU A: 185, VAL A: 77, SER A: 78, ARG A: 52, LEU A: 40, ASP A: 81, TRP A: 41                                                                       |
| 3           | -16.19 | ARG A: 52                       | GLU A: 31, LEU A: 151, ILE A: 198, SER A: 194, ALA A: 152, PRO A: 195, LEU A: 193, PRO A: 74, LEU A: 185, VAL A: 77, ILE A: 190, ASP A: 81, ALA A: 191, LEU A: 192, THR A: 38, LEU A: 40, SER A: 39, TRP A: 41, ARG A: 82, SER A: 78, LYS A: 36, ALA A: 149, LEU A: 34, VAL A: 150, LEU A: 32                       |
| 4           | -13.12 | ALA A: 152, VAL A: 150          | THR A: 38, LEU A: 192, LEU A: 193, LYS A: 36, SER A: 194, LEU A: 34, PRO A: 195, GLU A: 31, ALA A: 149, LEU A: 185, ILE A: 198, PRO A: 74, LEU A: 151, VAL A: 77, SER A: 78, LEU A: 40, ASP A: 81                                                                                                                   |
| 5           | -12.85 | TRP A: 41, LEU A: 193           | LEU A: 185, SER A: 194, ILE A: 198, ALA A: 152, PRO A: 195, VAL A: 77, SER A: 78, ARG A: 52, ALA A: 191, ASP A: 81, CYS A: 85, ARG A: 82, LEU A: 34, LEU A: 40, THR A: 38, LYS A: 36, LEU A: 192                                                                                                                    |
| 6           | -16.17 | CYS A: 85                       | LEU A: 40, SER A: 39, THR A: 38, LYS A: 36, ARG A: 82, LEU A: 34, LEU A: 33, ARG A: 30, ALA A: 149, GLU A: 31, HIS B: 67, VAL A: 150, LEU A: 193, SER A: 194, LEU A: 151, PRO A: 195, ALA A: 152, ILE A: 198, LEU A: 185, VAL A: 77, SER A: 78, ILE A: 190, ARG A: 52, ASP A: 81, ALA A: 191, TRP A: 41, LEU A: 192 |

### EGFR

|   |        |                           |                                                                                                                                                                                                            |
|---|--------|---------------------------|------------------------------------------------------------------------------------------------------------------------------------------------------------------------------------------------------------|
| 1 | -10.04 | CYS A: 751                | 783ARG A: 817, CYS A: 773, GLY A: 772, LEU A: 694, MET A: 769, VAL A: 702, GLN A: 767, LEU A: 820, ALA A: 719, THR A: 830, MET A: 742, GLU A: 738, LYS A: 721, ASP A: 831                                  |
| 2 | -10.27 | ASP A: 831                | LEU A: 694, GLY A: 772, MET A: 769, ALA A: 719, LEU A: 768, GLN A: 767, VAL A: 702, LEU A: 820, THR A: 830, THR A: 766, PHE A: 699, LYS A: 721, ARG A: 817, ASN A: 818, CYS A: 773, PHE A: 771             |
| 3 | -10.59 | -                         | VAL A: 702, ASP A: 831, ALA A: 698, GLU A: 734, ASP A: 813, ASN A: 818, ALA A: 731, LEU A: 834, GLY A: 833, ARG A: 817, LYS A: 851, LEU A: 723, ILE A: 735, GLU A: 738, PHE A: 699, LYS A: 721             |
| 4 | -10.62 | THR A: 766,<br>ARG A: 817 | VAL A: 702, GLN A: 767, ALA A: 719, LEU A: 768, MET A: 769, LEU A: 694, LEU A: 820, GLY A: 772, CYS A: 773, ASN A: 818, ASP A: 831, PHE A: 699, LYS A: 721, THR A: 830, GLU A: 738, MET A: 742, CYS A: 751 |
| 5 | -10.73 | ASP A: 831                | LYS A: 721, ASN A: 818, PHE A: 699, ARG A: 817, LEU A: 820, CYS A: 773, PHE A: 771, VAL A: 702, LEU A: 694, MET A: 769, GLY A: 772, GLN A: 767, LEU A: 768, ALA A: 719, THR A: 766, THR A: 830             |
| 6 | -10.02 | -                         | ALA A: 719, GLY A: 772, VAL A: 702, THR A: 766, LYS A: 721, ASP A: 831, PHE A: 699, GLY A: 695, ASN A: 818, ARG A: 817, CYS A: 773, LEU A: 820, LEU A: 768, MET A: 769, LEU A: 694                         |

### VEGFR

|   |        |                                                          |                                                                                                                                                                                                                                             |
|---|--------|----------------------------------------------------------|---------------------------------------------------------------------------------------------------------------------------------------------------------------------------------------------------------------------------------------------|
| 1 | -10.25 | ARG A: 1049,<br>ASN A: 921,<br>LEU A: 838,<br>CYS A: 917 | GLY A: 839, VAL A: 846, ALA A: 864, GLU A: 915, PHE A: 916, LYS A: 918, PHE A: 919, GLY A: 920, LEU A: 1033, PHE A: 1045                                                                                                                    |
| 2 | -11.56 |                                                          | PHE A: 843, LYS A: 866, ALA A: 879, LEU A: 880, GLU A: 883, ILE A: 886, LEU A: 887, ILE A: 890, VAL A: 896, VAL A: 897, LEU A: 1017, CYS A: 1022, ILE A: 1023, HIS A: 1024, ARG A: 1025, ILE A: 1042, CYS A: 1043, ASP A: 1044, GLY A: 1046 |
| 3 | -11.30 | -                                                        | HIS A: 814, CYS A: 815, LYS A: 866, SER A: 882, GLU A: 883, ILE A: 886, LEU A: 887, ILE A: 890, VAL A: 896, VAL A: 897, LEU A: 1017, CYS A: 1022, ILE A: 1023, HIS A: 1024, ARG A: 1025, ASP A: 1026, ILE A: 1042, CYS A: 1043, GLY A: 1046 |
| 4 | -10.78 | ILE A: 1023                                              | PHE A: 843, LYS A: 866, ALA A: 879, LEU A: 880, ILE A: 886, LEU A: 887, ILE A: 890, VAL A: 896, VAL A: 897, LEU A: 1017, CYS A: 1022, HIS A: 1024, ARG A: 1025, ILE A: 1042, CYS A: 1043, ASP A: 1044, GLY A: 1046                          |
| 5 | -12.29 | -                                                        | ILE A: 886, GLU A: 883, ASP A: 1044, GLY A: 1046, VAL A: 914, PHE A: 1045, CYS A: 1043, LEU A: 887, VAL A: 897, ILE A: 1042, VAL A: 896, ILE A: 890, LEU A: 1017, HIS A: 1024, ILE A: 1023, CYS A: 1022, ARG A: 1025                        |
| 6 | -10.86 | -                                                        | SER A: 882, ILE A: 886, HIS A: 1024, ARG A: 1025, HIS A: 889, HIS A: 814, VAL A: 897, LEU A: 1017, CYS A: 1022, ILE A: 890, ASP A: 1044, VAL A: 896, CYS A: 1043, LEU A: 887, LEU A: 880, GLU A: 883, ALA A: 879, PHE A: 843, GLY A: 1046   |

### P53

|   |        |                       |                                                                                                                                                                |
|---|--------|-----------------------|----------------------------------------------------------------------------------------------------------------------------------------------------------------|
| 1 | -9.86  | GLN A: 23             | ARG A: 10, PHE A: 16, ASN A: 17, LYS A: 20, ILE A: 21, ILE A: 22, GLY A: 24, GLU A: 89, TYR A: 92, LEU A: 100, LEU A: 103, ARG A: 104, CYS A: 114, PRO A: 115  |
| 2 | -10.39 | GLNA: 23,<br>ILEA: 21 | ARG A: 10, PHE A: 16, ASN A: 17, LYS A: 20, ILE A: 22, GLU A: 89, ARG A: 90, TYR A: 92, LEU A: 100, LEU A: 103, ARG A: 104, CYS A: 114, PRO A: 115, ARG A: 203 |

|               |        |                                             |                                                                                                                                                                                                                                                                                    |
|---------------|--------|---------------------------------------------|------------------------------------------------------------------------------------------------------------------------------------------------------------------------------------------------------------------------------------------------------------------------------------|
| 3             | -10.20 | ARG A:203, SER A: 204, TYR A: 92            | ARG A: 10, ASN A: 17, LYS A: 20, ILE A: 21, ILE A: 22, GLN A: 23, ARG A: 90, LEU A: 100, LEU A: 103, ARG A: 104, CYS A: 114, PRO A: 115, LEU A: 125, ALA A: 200, SER A: 228, VAL A: 229, THR A: 230                                                                                |
| 4             | -10.83 | ILE A: 21, PHE A:16, THR A: 230, ARG A: 203 | ARG A: 10, ASN A: 17, LYS A: 20, ILE A: 22, GLN A: 23, GLU A: 89, TYR A: 92, LEU A: 100, GLY A: 199, ALA A: 200, VAL A: 229, PRO A: 231, ASN A: 232                                                                                                                                |
| 5             | -11.44 | ARG A: 104, GLN A: 23                       | ALA A: 200, PHE A: 16, ILE A: 22, ILE A: 21, ASN A: 17, LEU A: 100, LYS A: 20, CYS A: 114, PRO A: 115, LEU A: 103, GLY A: 24, ARG A: 203, ARG A: 10, GLY A: 199, GLU A: 89                                                                                                         |
| 6             | -11.58 | ARG A: 10, ARG A: 203                       | ASN A: 232, GLU A: 13, LYS A: 20, PHE A: 16, GLN A: 23, ILE A: 21 ILE A: 22, LEU A: 100, PRO A: 115, CYS A: 114, ARG A: 90, LEU A: 103, PHE A: 117, TYR A: 92, ALA A: 200, SER A: 228, GLU A: 89, VAL A: 229, THR A: 230, GLY A: 199, ASN A: 17, LYS A: 18                         |
| <b>PARP-1</b> |        |                                             |                                                                                                                                                                                                                                                                                    |
| 1             | -11.15 | GLY A: 863                                  | GLY A: 888, TYR A: 889, HIS A: 862, SER A: 904, ALA A: 898, LYS A: 903, PHE A: 897, TYR A: 896, GLU A: 988, MET A: 980                                                                                                                                                             |
| 2             | -11.32 | ALA A: 880                                  | ASN A: 868, PRO A: 881, ARG A: 878, ILE A: 879, ILE A: 895, GLY A: 894, TYR A: 896, TYR A: 889, HIS A: 862, GLN A: 875, LUE A: 877, GLY A: 876, GLY A: 871, ILE A: 872                                                                                                             |
| 3             | -13.59 | ARG A: 878                                  | GLN A: 875, GLY A: 876, GLY A: 871, LEU A: 877, ILE A: 872, SER A: 864, HIS A: 862, ASN A: 868, HIS A: 909, ARG A: 865, GLY A: 863, PHE A: 897, GLU A: 988, LYS A: 903, ASN A: 897, ALA A: 898, SER A: 904, TYR A: 896, TYR A: 907, GLY A: 888, TYR A: 889, GLY A: 894, ALA A: 880 |
| 4             | -11.42 | GLY A: 876, ARG A: 878, ALA A: 880          | PRO A: 881, ILE A: 895, ILE A: 879, GLY A: 894, TYR A: 896, TYR A: 889, HIS A: 862, ILE A: 872, LEU A: 877, GLY A: 871, GLN A: 875, ASN A: 868                                                                                                                                     |
| 5             | -12.97 | GLY A: 894                                  | SER A: 904, ALA A: 898, GLU A: 988, LYS A: 903, MET A: 890, TYR A: 896, GLY A: 888, TYR A: 889, LYS A: 893, ALA A: 880, ILE A: 879, ARG A: 878, ILE A: 895, LEU A: 877, HIS A: 862, PHE A: 897                                                                                     |
| 6             | -13.39 | TYR A: 889, ALA A: 880                      | ARG A: 878, LEU A: 877, ILE A: 872, ILE A: 895, GLY A: 894, HIS A: 862, TYR A: 896, SER A: 864, GLY A: 863, LYS A: 903, ALA A: 898, GLU A: 988, PHE A: 897, TYR A: 907, SER A: 904, GLY A: 888, ILE A: 879, PRO A: 881                                                             |
